# Supplementary material
Source: PubMed Central journal article supplement (PMC6825834)
Supplement: kwz190_abraham_web_material_final.pdf [file kwz190_abraham_web_material_final.pdf]

# Web Material

## **Inflammation and Risk of Depression in HIV: Prospective Findings From the Multicenter AIDS Cohort Study**

Haidong Lu, Pamela J. Surkan, Michael R. Irwin, Glenn J. Treisman,  
Elizabeth C. Breen, Ned Sacktor, Ron Stall, Steven M. Wolinsky, Lisa P.  
Jacobson, and Alison G. Abraham

### Table of Contents

|                   |   |
|-------------------|---|
| Web Table 1.....  | 2 |
| Web Table 2.....  | 3 |
| Web Table 3.....  | 4 |
| Web Table 4.....  | 5 |
| Web Figure 1..... | 6 |

**Web Table 1.** Factor loadings showing the strength of association between EFA-identified inflammatory processes (EIPs) and individual markers of immune activation and inflammation in the full study sample (N=9,827 person visits)

| Marker                | Factor Loadings for EFA-identified Processes in CES-D Sample |             |             |
|-----------------------|--------------------------------------------------------------|-------------|-------------|
|                       | EIP-1                                                        | EIP-2       | EIP-3       |
| sTNFr2                | <b>0.92<sup>a</sup></b>                                      | 0.16        | 0.01        |
| sIL2 $\alpha$         | <b>0.81</b>                                                  | 0.07        | -0.02       |
| sCD27                 | <b>0.81</b>                                                  | 0.07        | -0.11       |
| BAFF                  | <b>0.63</b>                                                  | 0.09        | 0.09        |
| IP-10                 | <b>0.57</b>                                                  | 0.16        | 0.11        |
| sIL6r                 | <b>0.53</b>                                                  | -0.01       | 0.07        |
| sCD14                 | <b>0.50</b>                                                  | 0.04        | 0.10        |
| sGP130                | <b>0.47</b>                                                  | 0.02        | 0.02        |
| IL-6                  | 0.21                                                         | <b>0.66</b> | 0.00        |
| IL-8                  | 0.02                                                         | <b>0.66</b> | 0.20        |
| TNF- $\alpha$         | 0.39                                                         | <b>0.64</b> | 0.02        |
| MIP-1 $\beta$         | -0.14                                                        | <b>0.55</b> | 0.12        |
| MCP-1                 | 0.24                                                         | 0.10        | <b>0.81</b> |
| Eotaxin               | -0.01                                                        | 0.04        | <b>0.67</b> |
| MCP-4                 | 0.00                                                         | 0.15        | <b>0.49</b> |
| Variance explained, % | 31                                                           | 15          | 11          |
| Cumulative variance   | 31                                                           | 46          | 57          |

Abbreviations: BAFF, B-cell activating factor; sCD14, soluble CD14; sCD27, soluble CD 27; sGP130, soluble GP130; IL-6, interleukin 6; IL-8, interleukin 8; IP-10, interferon  $\gamma$ -induced protein 10; MCP-1, monocyte chemoattractant protein 1; MCP-4, monocyte chemoattractant protein 1; MIP-1, macrophage inflammatory protein 1 beta; sIL2 $\alpha$ , soluble interleukin 2 receptor  $\alpha$ ; sTNFr2, soluble TNF receptor 2; TNF, tumor necrosis factor; EIP, EFA-identified inflammatory process

<sup>a</sup> Boldface showing salient factors using criterion of factor loadings >0.4.

**Web Table 2.** Factor Score Distribution for Each EFA-identified inflammatory process (EIP)<sup>a</sup>, by HIV Serostatus using person-visits across time.

|                    | Mean   | Standard Deviation | Median | Minimum | Maximum |
|--------------------|--------|--------------------|--------|---------|---------|
| HIV+ person visits |        |                    |        |         |         |
| EIP-1              | 0.076  | 0.957              | -0.045 | -5.368  | 6.171   |
| EIP-2              | 0.002  | 0.850              | -0.125 | -3.425  | 7.884   |
| EIP-3              | 0.013  | 0.890              | 0.038  | -15.295 | 3.103   |
| HIV- person visits |        |                    |        |         |         |
| EIP-1              | -0.583 | 0.778              | -0.708 | -2.574  | 5.138   |
| EIP-2              | -0.014 | 0.924              | -0.138 | 4.350   | 7.075   |
| EIP-3              | -0.099 | 0.836              | -0.077 | -2.483  | 2.404   |

Abbreviations: EFA, exploratory factor analysis; EIP, EFA-identified inflammatory process; HIV, human immunodeficiency virus.

<sup>a</sup> EIP-1 was mainly characterized by sTNFr2, sIL2r $\alpha$ , sCD27, B-cell activating factor, IP-10, sIL6r, sCD14, and sGP130; Inflammatory process EIP-2, by IL-6, IL-8, TNF- $\alpha$ , and MIP-1 $\beta$ ; Inflammatory process EIP-3, by MCP-1, eotaxin and MCP-4.

**Web Table 3.** Adjusted logistic regression of depressive symptoms on categorical estimates of EFA-identified inflammatory processes (EIPs) comparing highest tertile EIP to lowest in HIV+ and HIV- participants from MACS from 1984 to 2010

| EIP and Definition of Depression        | Depressive symptoms, HIV+ participants |            | Depressive symptoms, HIV- participants |            |
|-----------------------------------------|----------------------------------------|------------|----------------------------------------|------------|
|                                         | OR <sup>b</sup>                        | 95% CI     | OR                                     | 95% CI     |
| <b>EIP-1</b>                            |                                        |            |                                        |            |
| CES-D only <sup>c</sup>                 | 1.21                                   | 1.06, 1.37 | 1.52                                   | 0.95, 2.43 |
| CES-D + antidepressant use <sup>d</sup> | 1.21                                   | 1.05, 1.39 | 1.15                                   | 0.76, 1.76 |
| <b>EIP-2</b>                            |                                        |            |                                        |            |
| CES-D only                              | 1.08                                   | 0.96, 1.22 | 0.93                                   | 0.66, 1.29 |
| CES-D + antidepressant use              | 1.12                                   | 1.00, 1.26 | 0.94                                   | 0.69, 1.29 |
| <b>EIP-3</b>                            |                                        |            |                                        |            |
| CES-D only                              | 1.05                                   | 0.91, 1.21 | 1.00                                   | 0.70, 1.41 |
| CES-D + antidepressant use              | 1.13                                   | 0.97, 1.31 | 0.94                                   | 0.68, 1.29 |

Abbreviations: MACS, the Multicenter AIDS Cohort Study; CES-D, Center for Epidemiologic Studies Depression Scale; OR, odds ratio; CI, confidence interval; EIP, EFA-identified inflammatory process

<sup>a</sup> Adjusted for age, black race, college education, current smoking, obesity, HCV infection, alcohol intake and cocaine use since last visit; generalized estimating equations (GEE) utilized for analyses.

<sup>b</sup> Comparison of highest EIP tertile to lowest EIP tertile; the ORs comparing the middle EIP tertile to the lowest were not statistically significant for all three EIPs.

<sup>c</sup> Clinically relevant depressive symptoms defined as CES-D >20 compared to having not depressive symptoms defined as CES-D <12.

<sup>d</sup> Clinically relevant depressive symptoms defined as CES-D >20 or having antidepressant use compared to having not depressive symptoms defined as CES-D <12 and having no antidepressant use.

**Web Table 4.** Adjusted logistic regression of depressive symptoms on continuous estimates of EFA-identified Processes (EIPs) in HIV+ participants stratified by calendar time (cART era and pre-cART era) from MACS from 1984 to 2010

| EIP and Definition of Depression        | Depressive symptoms, HIV+ participants |            |              |            |
|-----------------------------------------|----------------------------------------|------------|--------------|------------|
|                                         | cART era <sup>a</sup>                  |            | pre-cART era |            |
|                                         | OR <sup>b</sup>                        | 95% CI     | OR           | 95% CI     |
| <b>EIP-1</b>                            |                                        |            |              |            |
| CES-D only <sup>c</sup>                 | 1.09                                   | 1.02, 1.17 | 1.06         | 0.92, 1.21 |
| CES-D + antidepressant use <sup>d</sup> | 1.08                                   | 1.02, 1.14 | 1.26         | 1.12, 1.41 |
| <b>EIP-2</b>                            |                                        |            |              |            |
| CES-D only                              | 1.02                                   | 0.96, 1.09 | 1.09         | 0.92, 1.31 |
| CES-D + antidepressant use              | 1.00                                   | 0.95, 1.05 | 1.03         | 0.87, 1.20 |
| <b>EIP-3</b>                            |                                        |            |              |            |
| CES-D only                              | 0.92                                   | 0.85, 1.00 | 1.04         | 0.89, 1.21 |
| CES-D + antidepressant use              | 0.98                                   | 0.92, 1.04 | 1.13         | 0.97, 1.30 |

Abbreviations: MACS, the Multicenter AIDS Cohort Study; CES-D, Center for Epidemiology Study of Depression Scale; OR, odds ratio; CI, confidence interval; cART, combination Antiretroviral Therapy; EIP, EFA-identified inflammatory process

<sup>a</sup> Pre-cART era was defined as 1984 to June 30, 1996; and cART era was defined as July 1, 1996 to 2010.

<sup>b</sup> Adjusted variables were age, black race, college education, current smoking, obesity, HCV infection, alcohol intake and cocaine use since last visit; generalized gamma equations (GEE) utilized for analyses.

<sup>c</sup> Clinically relevant depressive symptoms defined as CES-D >20 compared to having not depressive symptoms defined as CES-D <12.

<sup>d</sup> Clinically relevant depressive symptoms defined as CES-D >20 or having antidepressant use compared to having not depressive symptoms defined as CES-D <12 and having no antidepressant use.

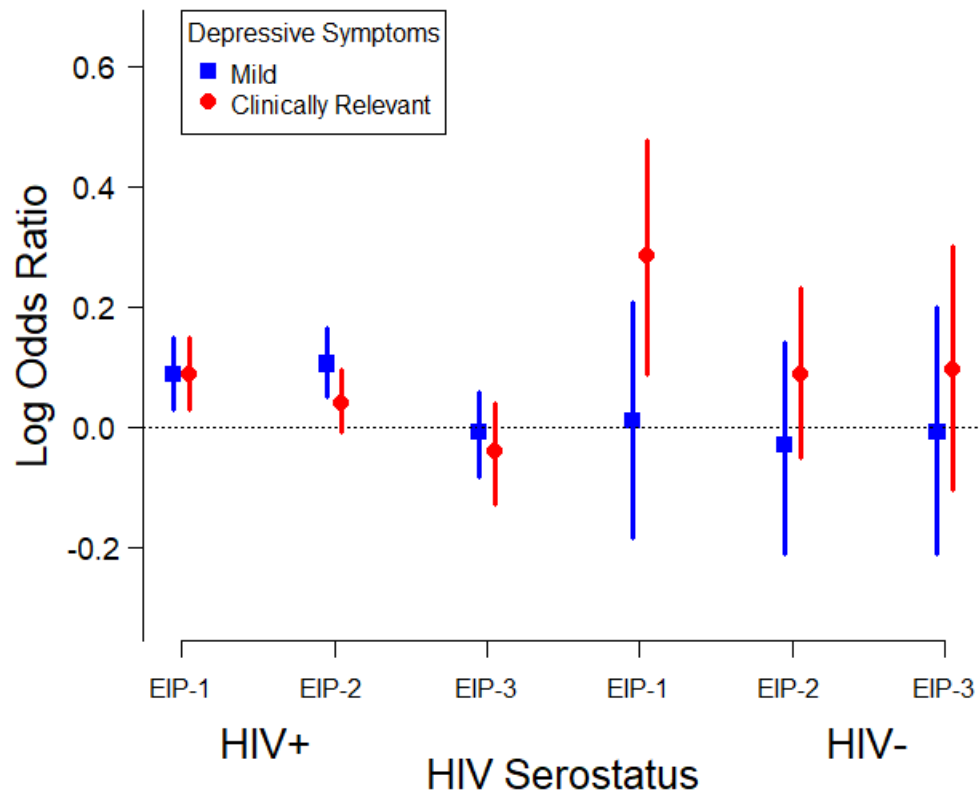

**Web Figure 1.** Adjusted logistic regressions of mild depressive symptoms (CES-D 12-20) and depressive symptoms (CES-D >20) on continuous estimates of EFA-identified inflammatory processes (EIPs) in HIV+ and HIV- person-visits in the MACS from 1984 to 2010. Adjusted multinomial logistic regression results showing that the association between continuous estimates of EFA-identified inflammatory process (EIP) 1 and 2 and mild depressive symptoms (CES-D 12-20) was significant among HIV+ persons. In contrast, such associations were not observed among HIV- persons. Abbreviations: MACS, the Multicenter AIDS Cohort Study; CES-D, Center for Epidemiology Study of Depression Scale; CI, confidence interval; EIP, EFA-identified inflammatory process
